# Supplementary material
Source: PubMed Central journal article supplement (PMC2597595)
Supplement: blood-2008-05-155374_1.pdf [file blood-2008-05-155374_1.pdf]

| Model parameter                                                                                  | B6 reference value      | D2 reference values      |
|--------------------------------------------------------------------------------------------------|-------------------------|--------------------------|
| $\tau_c$ (G <sub>1</sub> , S, G <sub>2</sub> + M)                                                | 24 h (12, 8, 4)         | 20 h (8, 8, 4)           |
| $d$                                                                                              | 1.07                    | 1.07                     |
| $r$                                                                                              | 1.1                     | 1.1                      |
| $f_\alpha: \tilde{N}; f_\alpha(0); f_\alpha(\tilde{N}); f_\alpha(\tilde{N}/2); f_\alpha(\infty)$ | 1300; 0.5; 0.3; 0.01; 0 | 1300; 0.7; 0.3; 0.015; 0 |
| $f_\omega: \tilde{N}; f_\omega(0); f_\omega(\tilde{N}); f_\omega(\tilde{N}/2); f_\omega(\infty)$ | 280; 0.5; 0.3; 0.1; 0   | 340; 0.6; 0.23; 0.017; 0 |
| $\lambda$ ( $\lambda_p + \lambda_n$ )                                                            | 500 h (300 h + 200 h)   | 500 h (300 h + 200 h)    |
| $a_{min}$                                                                                        | 0.01                    | 0.01                     |
| $a_{max}$                                                                                        | 1.0                     | 1.0                      |
